# Supplementary material
Source: PubMed Central journal article supplement (PMC4554493)
Supplement: 10-1055-s-0035-1557817-sup_gf939.pdf [file 10-1055-s-0035-1557817-sup_gf939.pdf]

# Einflussfaktoren auf die Frühgeburt in Deutschland – Analyse der für Deutschland repräsentativen KiGGS-Daten

## Factors for Preterm Births in Germany – An Analysis of Representative German Data (KiGGS)

### Autoren

A. Weichert<sup>1</sup>, T. M. Weichert<sup>2</sup>, R. L. Bergmann<sup>1</sup>, W. Henrich<sup>1</sup>, K. D. Kalache<sup>3</sup>, R. Richter<sup>4</sup>, J. Neymeyer<sup>5</sup>, K. E. Bergmann<sup>1</sup>

### Institute

<sup>1</sup> Charité – Universitätsmedizin Berlin, Klinik für Geburtsmedizin, Berlin

<sup>2</sup> Bezirksamt Mitte von Berlin, Gesundheitsamt – Kinder- und Jugendgesundheitsdienst, Berlin

<sup>3</sup> Sidra Medical and Research Center, Obstetrics & Gynecology Department, Doha, Qatar

<sup>4</sup> Charité – Universitätsmedizin Berlin, Klinik für Gynäkologie, Berlin

<sup>5</sup> Charité – Universitätsmedizin Berlin, Klinik für Urologie, Berlin

### Schlüsselwörter

- Kindheit
- Adoleszenz
- Frühgeburt
- Schwangerschaft
- Epidemiologie

### Key words

- childhood
- adolescence
- preterm birth
- pregnancy
- epidemiology

### Zusammenfassung

**Einleitung:** Die Frühgeburt ist die Hauptursache für perinatale Mortalität und Morbidität und ein weltweites Problem. Das Ziel dieser Studie war, die Hauptrisikofaktoren für eine Frühgeburt aus dem Kinder- und Jugendgesundheits-Survey (KiGGS) zu identifizieren. Als mögliche Einflussfaktoren auf die Frühgeburt wurden im Fragenkatalog Fragen aus den Bereichen Geschlecht, Herkunft, Migrationshintergrund, Demografie, Lebensumstände, Familienstrukturen, Schul- und Berufsausbildung der Eltern ausgewählt.

**Methoden:** Datengrundlage war der KiGGS-Survey, der in den Jahren 2003 bis 2006 durchgeführt wurde. Insgesamt nahmen an der Studie 17 641 Kinder und Jugendliche (8 656 Mädchen und 8 985 Jungen) aus 167 für die Bundesrepublik repräsentativen Städten und Gemeinden teil. Das Gestationsalter bei der Geburt war in 14 234 Datensätzen vorhanden. Als mögliche Einflussfaktoren auf die Frühgeburt wurden im Fragenkatalog Fragen aus den Bereichen Geschlecht, Herkunft, Migrationshintergrund, Demografie, Lebensumstände, Familienstrukturen, Schul- und Berufsausbildung der Eltern ausgewertet.

**Ergebnisse:** Die Frühgeburtsrate betrug 11,6% und lag damit höher als in anderen nationalen Statistiken. 57,4% der Mehrlingsschwangerschaften und 10% der Einlingsschwangerschaften werden als Frühgeburt geboren. Mehrlingsschwangerschaft war der wichtigste Risikofaktor (OR 13,116). Hinsichtlich der Herkunft und des Migrationshintergrunds waren Mütter aus der Türkei, aus Mittelost und Nordafrika am häufigsten von einer Frühgeburt betroffen. Die Frühgeburt hat eine höhere Inzidenz in Großstädten gegenüber Kleinstädten und Dörfern.

**Zusammenfassung:** Risikofaktoren, die mit einer Frühgeburt assoziiert waren, wurden identifiziert. Diese sollen helfen, Risikoschwangere rechtzeitig zu identifizieren. Die Frühgeburtsrate

### Abstract

**Introduction:** Preterm birth is a global scourge, the leading cause of perinatal mortality and morbidity. This study set out to identify the principal risk factors for preterm birth, based on the German Health Interview and Examination Survey for Children and Adolescents (KiGGS). A range of possible factors influencing preterm birth were selected for inclusion in the questionnaire, covering factors such as gender, national origin, immigrant background, demography, living standard, family structure, parental education and vocational training.

**Methods:** All data were taken from the aforementioned KiGGS survey conducted between 2003 and 2006. A total of 17 641 children and adolescents (8 656 girls and 8 985 boys) drawn from 167 German towns and municipalities deemed to be representative of the Federal Republic of Germany were included in the study. Gestational age at birth was available for 14 234 datasets. The questionnaire included questions from the following areas as possible factors influencing preterm birth: gender, national origins, immigrant background, demography, living standard, family structure, parental education and vocational training.

**Results:** The preterm birthrate was 11.6%, higher than that of other national statistical evaluations. Around 57.4% of multiple pregnancies and 10% of singleton pregnancies resulted in preterm delivery. Multiple pregnancy was found to be the most important risk factor (OR 13.116). With regard to national origins and immigration background, mothers from Turkey, the Middle East, and North Africa had a higher incidence of preterm birth. Preterm birth was more prevalent in cities and large towns than in small towns and villages.

**Conclusion:** Risk factors associated with preterm birth were identified. These should help with the early identification of pregnant women at risk.

eingereicht 29.3.2015

revidiert 3.6.2015

akzeptiert 11.6.2015

### Bibliografie

**DOI** <http://dx.doi.org/10.1055/s-0035-1557817>  
Geburtsh Frauenheilk 2015; 75:  
1–9 © Georg Thieme Verlag KG  
Stuttgart · New York ·  
ISSN 0016-5751

### Korrespondenzadresse

**Dr. Alexander Weichert, MD**  
Charité-Universitätsmedizin  
Berlin  
Department of Obstetrics  
Charitéplatz 1  
10117 Berlin  
[alexander.weichert@charite.de](mailto:alexander.weichert@charite.de)

aus unserem Survey ist höher als die anderer nationaler Statistiken, die jedoch auf Prozessdaten basieren. Mehr als die Hälfte aller Mehrlingsschwangerschaften endet als Frühgeburt.

## Einleitung

Die Frühgeburt (Geburt vor 37 + 0 Schwangerschaftswochen) ist die Hauptursache perinataler Morbidität und Mortalität. Im Verlauf der letzten beiden Jahrzehnte ist die Frühgeburtenrate in den meisten Ländern trotz zunehmender Kenntnisse über mögliche Risikofaktoren und ihre Pathomechanismen gleich geblieben oder sogar angestiegen [1–5].

Im Jahr 2013 betrug die Frühgeburtenrate in Deutschland 8,7% [6]. Damit gehört sie zu den höchsten im europäischen Vergleich [7]. Weltweit liegt die Frühgeburtenrate zwischen 7–14%, was ca. 15 Millionen betroffenen Kindern jährlich entspricht.

Ungefähr 75% der perinatalen Mortalität und mehr als die Hälfte der perinatal bedingten Langzeitmorbidität sind frühgeburtsassoziiert [8]. Weltweit ist die Frühgeburt mit 27% die Hauptursache für neonatalen Tod (innerhalb der ersten 28 Lebenstage) und führt damit jährlich zu mehr als einer Million verstorbener Kinder [9]. Zu den typischen frühgeburtsassoziierten Folgeerkrankungen gehören: neonatales Atemwegssyndrom (respiratory distress syndrome, RDS), persistierender Ductus arteriosus (PDA), Frühgeborenen-Retinopathie (ROP), intraventrikuläre Hämorrhagie (IVH), periventrikuläre Leukomalazie (PVL) und bronchopulmonale Dysplasie (BPD) [10].

Die frühgeburtsassoziierte Mortalität und Morbidität konnte nach Einführung der antenatalen Kortikoidtherapie und Verbesserungen bei der intensivmedizinischen Versorgung gesenkt werden. Trotzdem bestehen neben den o.g. unmittelbaren perinatalen Folgen auch solche, die das weitere Leben betroffener Kinder, aber auch ihrer Angehöriger beeinträchtigen. Zu den typischen Folgeerkrankungen frühgeborener Kinder gehören Zerebralparesen und Atemwegserkrankungen, aber auch sensorische Defizite und Lernschwierigkeiten [11]. Ferner erreichen Frühgeborene eine geringere durchschnittliche Körpergröße [12].

Erwähnenswert ist darüber hinaus, dass auch die reproduktive Phase ehemals frühgeborener Frauen beeinflusst wird. So ist ein niedriges Geburtsgewicht (unabhängig ob durch Frühgeburt oder Wachstumsverzögerung bedingt) nicht nur ein Risikofaktor für hypertensive (einschließlich Präeklampsie) und diabetogene Schwangerschaftskomplikationen [13, 14], sondern auch für eine Frühgeburt der eigenen Kinder [15].

Die besseren Überlebensraten haben aber auch zu einer Änderung des ärztlichen Verhaltens bei der Entscheidungsabwägung zwischen Fortsetzen der Schwangerschaft und frühgeburtsbedingter Risiken geführt und damit den Anteil iatrogener Frühgeburten erhöht [16].

Die Ursachen der Frühgeburt können wie folgt eingeteilt werden:

1. Vorzeitige Entbindung aus fetaler oder maternaler Indikation (z.B. Präeklampsie, Placenta-*praevia*-Blutung, Mehrlingsschwangerschaften oder fetale Wachstumsverzögerung),
2. spontane vorzeitige Wehen ohne Blasensprung und
3. vorzeitiger Blasensprung mit vorzeitiger Entbindung.

Ca. 70% fallen auf die beiden letzten Gruppen [17, 18], die als „spontane Frühgeburt“ bezeichnet werden.

An der Ätiologie scheinen komplexe Mechanismen beteiligt zu sein, wobei Daten bereits publizierter Studien darauf hindeuten, dass Infektionen wie die Chorioamnionitis ein bedeutender Ko-

The preterm birthrate in our survey was higher than that found in other national statistical evaluations based on process data. More than half of all multiple pregnancies ended in preterm birth.

faktor – insbesondere in einem frühen Schwangerschaftsalter – sind [19].

Als demografische Risikofaktoren für eine Frühgeburt kommt vor allem der Anstieg des mütterlichen Alters bei Schwangerschaft in Betracht. So zeigte eine Studie von Schure und Kollegen, dass mit steigendem Alter der Mutter und unabhängig von der Anzahl vorangegangener Lebendgeburten ein Anstieg der Frühgeburtenrate nachweisbar war [20].

Durch die Inanspruchnahme reproduktionsmedizinischer Maßnahmen ist die Zahl von Mehrlingsschwangerschaften angestiegen [21]. Darüber hinaus sind Mehrlingsschwangerschaften infolge reproduktionsmedizinischer Maßnahmen bei steigenden mütterlichem Alter häufiger [22, 23]. Die Frühgeburtenrate bei Mehrlingsschwangerschaften liegt bei 40–60% [24].

Risikofaktoren sind auch emotionale Belastungen und Stress. So konnte gezeigt werden, dass Schwangere, die nach den Anschlägen vom 11. September 2001 in New York unter einer posttraumatischen Belastungsstörung litten, häufiger eine Frühgeburt hatten (OR 2,48; 95%-KI 1,05–5,84) [25].

Kausale Zusammenhänge zwischen den meisten dieser Risikofaktoren und einer Frühgeburt sind trotzdem schwierig zu beweisen, weil die Zusammenhänge nicht durch randomisierte kontrollierte Studien untermauert werden können.

Da es sich beim KiGGS um eine Querschnittsstudie handelt, lassen sich nur Assoziationen und Prävalenzen beschreiben. Auf Grundlage von Vorwissen kann man aber oft Ursachen oder Folgen plausibel zuordnen. Es ist möglich, von einer hohen Validität auszugehen, wenn:

1. die Datengewinnung doppelblind erfolgt ist,
2. das Signifikanzniveau von  $p < 0,01$  unterschritten wird, wenn
3. Dosis-Wirkungs-Beziehungen bestehen, und
4. die Ergebnisse auch unter simultaner Berücksichtigung von Kofaktoren bestehen bleiben.

Ätiologische Beweisführungen sind mit Querschnittstudien nicht zu führen und benötigen andere Studiendesigns [26, 27].

In der vorliegenden Studie sollten folgende Fragestellungen überprüft werden:

1. Lässt sich aus den Daten des Kinder- und Jugendgesundheits-survey (KiGGS) die Frühgeburtenrate bestimmen?
2. Welche Kinder sind von einer Frühgeburt betroffen? Lassen sich aus den Daten potenzielle Einflussfaktoren auf die Entstehung der Frühgeburt in Deutschland extrahieren?

Ziel der Studie war somit, die Identifikation Hochrisikoschwangerer durch die Kenntnis von Einflussfaktoren zu verbessern, um ihre Betreuung intensivieren zu können. Bei klinischen Hinweisen auf eine drohende Frühgeburt könnten frühzeitig Interventionsmaßnahmen eingeleitet werden.

## Methoden

### Auswahl der Teilnehmer und Datengrundlage

Datengrundlage war der Kinder- und Jugendgesundheitssurvey (KiGGS) des Robert Koch-Instituts. Er wurde in den Jahren 2003 bis 2006 durchgeführt und war die erste bundesweit repräsentative und verallgemeinerungsfähige Studie zur Gesundheit von

Kindern und Jugendlichen im Alter von 0 bis 17 Jahren in Deutschland [28–30].

Zusammenfassend erfolgte die Teilnahmergewinnung durch ein 2-stufiges Verfahren, bei dem auf der 1. Stufe 167 Studienorte (Sample Points) repräsentativ für Deutschland ausgewählt wurden, um das bevölkerungsspezifische Maß an Urbanisation und geografischer Verteilung abzubilden. Zur Sicherstellung einer ausreichenden Stichprobengröße und Verallgemeinerungsfähigkeit nach Wohnort (neue, alte Bundesländer und Berlin) lagen von den 167 Studienorten 112 in den alten Bundesländern, 50 in den neuen Bundesländern und 5 in Berlin. Die Personenauswahl erfolgte in einer 2. Stufe durch eine alters- und geschlechtsgewichtete Zufallsstichprobe aus den Melderegistern der Einwohnermeldeämter.

In jedem Studienort wurden je nach Gemeindegröße zufällig 8, 9 oder 10 Kinder für jeden Geburtsjahrgang ausgewählt, was in Summe zu 144, 162 bzw. 180 teilnahmeberechtigten Personen führte, die zur Studienteilnahme eingeladen wurden.

Konjunkte Daten zu den untersuchten Einflussfaktoren bzw. Kovariablen wurden aus Fragebögen der Eltern und ihrer Kinder gewonnen. Die Teilnahmequote betrug 66,6% und variierte zwischen den Altersgruppen und den Geschlechtern nur schwach. Unterschiede in der Teilnahme zeigten sich zwischen Migranten und Deutschen, zwischen Großstadtbewohnern (ab 100 000 Einwohner) und Studienorten mit weniger Einwohnern sowie zwischen den alten und den neuen Bundesländern (einschließlich Berlin). Der Anteil qualitätsneutraler Ausfälle war mit 5,3% vergleichsweise gering.

Zur Sicherstellung repräsentativer Aussagen wurden die Analysen mittels eines Gewichtungsfaktors angepasst, um die Abweichungen von der Bevölkerungsstruktur (Stand 31. Dezember 2004) hinsichtlich Alter, Geschlecht, Region (Berlin, Ost und West Deutschland) und Staatsangehörigkeit zu korrigieren.

Für weitere Einzelheiten und die Hintergründe der Methodologie des KiGGS wird an dieser Stelle auf andere Publikationen verwiesen [31–33].

### Studienkollektiv

Insgesamt nahmen an der Studie 17 641 Kinder und Jugendliche (8656 Mädchen und 8985 Jungen) aus 167 für die Bundesrepublik repräsentativen Städten und Gemeinden teil, darunter 14 836 Kinder und Jugendliche ab 3 Jahren mit einem Oversampling von Kindern und Jugendlichen mit Migrationshintergrund sowie aus den neuen Bundesländern.

Die für diese Auswertung verwendeten Daten wurden aus schriftlichen Angaben der Eltern (Fragebögen), zumeist der Mütter, aus den Unterlagen der Schwangerschaftsvorsorge (Mutterpass) und der Kindervorsorge (gelbes Vorsorgeheft) entnommen. Ferner erfolgten körperliche Untersuchungen, Anthropometrie und Labortests. Blutentnahmen erfolgten bei insges. 86% der Probandinnen und Probanden, wobei ein positives Votum der zuständigen Ethikkommission vorlag, da ein individueller Nutzen für jedes einzelne Kind erwartet werden konnte [34].

### Statistische Analyse

Die statistische Auswertung (Überschreitungswahrscheinlichkeiten und Konfidenzintervalle) erfolgte mit den Verfahren für komplexe Stichproben nach SPSS, Version 20 (IBM, Armonk, NY, USA, www.ibm.com). Gruppenunterschiede mit Überschreitungswahrscheinlichkeiten (p-Werte) von kleiner als 0,05 bzw. 0,01 oder mit 95%-Konfidenzintervallen, die sich nicht überschneiden, wurden als statistisch signifikant gewertet.

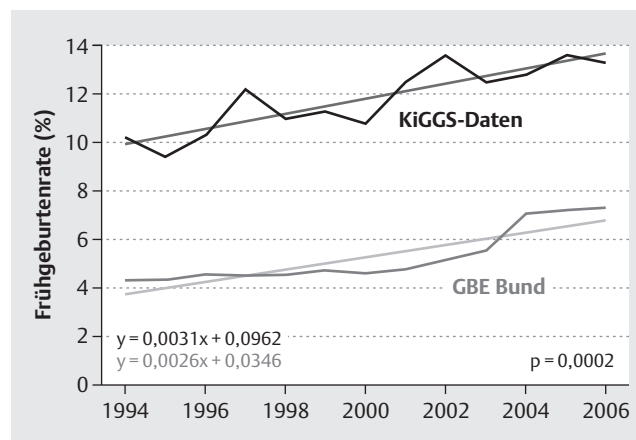

**Abb. 1** Prozentuale Entwicklung und Vergleich der Frühgeburtenrate in Deutschland im KiGGS und Daten der Gesundheitsberichterstattung des Bundes (GBE Bund) mit Trendlinien und korrespondierenden Geraden-gleichungen.

Es wurden zunächst die Datensätze identifiziert, in welchen das Gestationsalter bei der Entbindung bekannt war und die Frühgeburten ausgewählt. Als mögliche Einflussfaktoren auf die Frühgeburt wurden im Fragenkatalog Fragen aus den Bereichen Geschlecht, Herkunft, Migrationshintergrund, Demografie, Lebensumstände, Familienstrukturen, Schul- und Berufsausbildung der Eltern, ihrer beruflichen Stellung und dem Haushaltseinkommen ausgewählt und bi-/multivariaten statistischen Zusammenhangsanalysen zugeführt.

Abschließend wurden stratifizierte Prävalenzen ermittelt und für Gruppenunterschiede die Überschreitungswahrscheinlichkeiten berechnet, wobei der  $\chi^2$ -Test für nominale Daten und Kendalls tau b für ordinale Daten angewendet wurde.

Die Risikofaktoren der Frühgeburt wurden mit einer multivariablen logistischen Regression ermittelt, und Odds Ratios (OR) und 95%-Konfidenzintervalle (95%-KI) wurden bestimmt. Für die zeitliche Entwicklung der Raten wurden lineare Regressionsgleichungen berechnet.

### Ergebnisse

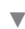

An der Studie nahmen 17 641 Kinder und Jugendliche (8656 Mädchen und 8985 Jungen) aus 167 für die Bundesrepublik repräsentativen Städten und Gemeinden teil. Das Gestationsalter bei der Geburt war in 14 234 Datensätzen vorhanden. Die **Tab. 1** gibt die wichtigsten Daten zu den Einflussfaktoren auf die Frühgeburt wieder. Mit diesen Datensätzen wurden bi-/multivariate statistische Zusammenhangsanalysen durchgeführt. Aufgrund der Komplexität des Sachverhalts erscheint es sinnvoll, die Assoziationen themenspezifisch aufzulisten.

### Frühgeburtenrate

Was die Frühgeburtenrate betrifft, lag im ausgewerteten Kollektiv in 11,6% der Fälle eine Geburt vor der 38. Schwangerschaftswoche ( $< 37 + 0$  SSW) vor.

In den einzelnen Geburtsjahrgängen (1985–2006) lag sie zwischen 8 und 14,9%. Die Geschlechterverteilung Frühgeborener betrug 12,0% bei männlichen und 11,1% bei weiblichen Neugeborenen ( $p = 0,047$ ).

**Tab. 1** Logistische Regression für Risiken der Frühgeburt. OR (Odds Ratio), 95%-KI (95%-Konfidenzintervall), p-Wert (Signifikanz). Signifikante Ergebnisse sind fett herausgehoben.

| Risikofaktor*                        | OR**   | 95 %-KI** |        | p-Wert |
|--------------------------------------|--------|-----------|--------|--------|
|                                      |        | unterer   | oberer |        |
| Schwangerschaftsfaktoren             |        |           |        |        |
| Mehrling                             | 13,116 | 10,896    | 15,790 | 0,000  |
| keine Angabe                         | 1,012  | 0,526     | 1,944  | 0,972  |
| Junge                                | 1,117  | 1,010     | 1,234  | 0,030  |
| maternale Faktoren                   |        |           |        |        |
| Nullipara                            | 1,470  | 1,322     | 1,634  | 0,000  |
| Alter der Mutter                     |        |           |        | 0,023  |
| ▶ 20–29 Jahre                        | 0,983  | 0,750     | 1,287  | 0,898  |
| ▶ 30–39 Jahre                        | 1,182  | 0,891     | 1,567  | 0,247  |
| ▶ 40 Jahre und älter                 | 1,212  | 0,745     | 1,971  | 0,440  |
| ▶ keine Angabe                       | 0,775  | 0,323     | 1,860  | 0,568  |
| Größe der Mutter (pro 10 cm)         | 0,804  | 0,746     | 0,867  | 0,000  |
| BMI der Mutter                       |        |           |        | 0,002  |
| ▶ < 19 kg/m²                         | 1,315  | 1,057     | 1,637  | 0,014  |
| ▶ 24– < 26 kg/m²                     | 0,879  | 0,759     | 1,018  | 0,085  |
| ▶ 26– < 28 kg/m²                     | 0,952  | 0,798     | 1,135  | 0,581  |
| ▶ 28– < 30 kg/m²                     | 0,764  | 0,613     | 0,951  | 0,016  |
| ▶ 30– < 35 kg/m²                     | 0,799  | 0,654     | 0,977  | 0,029  |
| ▶ ≥ 35 kg/m²                         | 1,109  | 0,865     | 1,421  | 0,415  |
| ▶ keine Angabe                       | 0,742  | 0,401     | 1,370  | 0,340  |
| gesellschaftliche Faktoren           |        |           |        |        |
| Sozialstatus                         |        |           |        | 0,000  |
| ▶ mittlerer                          | 0,805  | 0,713     | 0,910  | 0,001  |
| ▶ hoher                              | 0,701  | 0,606     | 0,812  | 0,000  |
| östliche Bundesländer                | 1,168  | 1,021     | 1,335  | 0,024  |
| Stadt                                |        |           |        | 0,008  |
| ▶ kleinstädtisch                     | 1,239  | 1,056     | 1,453  | 0,009  |
| ▶ mittelstädtisch                    | 1,315  | 1,123     | 1,541  | 0,001  |
| ▶ großstädtisch                      | 1,202  | 1,019     | 1,419  | 0,029  |
| Herkunft Mutter                      |        |           |        |        |
| ▶ Europa/Nordamerika/Australien      | 1,112  | 0,943     | 1,310  | 0,206  |
| ▶ Türkei/Nahost/Mittelost/Nordafrika | 1,501  | 1,207     | 1,867  | 0,000  |
| ▶ Schwarzafrika                      | 1,292  | 0,510     | 3,272  | 0,589  |
| ▶ Lateinamerika                      | 1,262  | 0,584     | 2,726  | 0,554  |
| ▶ Asien                              | 1,479  | 0,996     | 2,197  | 0,053  |
| ▶ keine Angabe                       | 1,006  | 0,580     | 1,746  | 0,982  |
| Konstante                            | 3,966  |           |        | 0,030  |

\* Die Referenzkategorien sind nicht aufgelistet, z. B. Einling, Mädchen, Multipara (Kind mit älteren Geschwistern), Land, westliche Bundesländer, ländlich, niedriger Sozialstatus, Deutschland, unter 20 Jahre, 19– < 24 kg/m<sup>2</sup>.

\*\* Eine OR über 1 bedeutet höheres Risiko; signifikant ist es, wenn der obere und untere 95%-KI über 1 liegen. Eine OR unter 1 bedeutet niedrigeres Risiko. Es ist signifikant, wenn der 95%-KI jeweils unter 1 beträgt.

57,4% der Mehrlinge und 10% der Einlinge wurden als Frühgeburten geboren. Im Verlauf der Jahre zeigte die Frühgeburtenrate einen ansteigenden Trend (► **Abb. 1**).

### Herkunft der Eltern

Bei Migranten war die Frühgeburtenrate signifikant höher als bei Nichtmigranten (13,8 vs. 11,2%,  $p < 0,001$ ). Deutsche Mütter hatten eine Frühgeburtenrate von 11%, Mütter aus Mitteleuropa 12,6%, aus Schwarzafrika 13,6% und aus Lateinamerika 15,3%. Am häufigsten von einer Frühgeburt betroffen waren Mütter aus der Türkei, dem Nahen Osten, dem Mittleren Osten und Nordafrika (17,3%) sowie Asien (17,2%) ( $p < 0,001$ ).

Bei 11,1% der Familien mit deutschem Vater kam eine Frühgeburt vor (gegenüber 10,1% bei europäischer Herkunft und 11,6% im Gesamtkollektiv). Eine Frühgeburt kam bei väterlicher Herkunft aus der Türkei, Nahost, Mittelost und Nordafrika (16%) sowie

Schwarzafrika (16,1%), Lateinamerika (16,2%) und Asien (16,3%) vor ( $p < 0,001$ ).

Bei Migrantinnen zeigte die Frühgeburtenrate eine Abhängigkeit von der Aufenthaltsdauer in Deutschland. Bei Müttern, die im Jahr der Entbindung nach Deutschland gekommen waren, betrug die Frühgeburtenrate 12,4%, während sie bei Frauen mit einer Aufenthaltsdauer zwischen 2 und 10 Jahren auf 14,3% anstieg, um ab dem 11. Jahr wieder auf 11,3% abzufallen (Gesamtkollektiv: 11,6%;  $p = 0,003$ ). Die Aufenthaltsdauer des Vaters ergab keinen statistisch signifikanten Einfluss.

### Einfluss des Wohnorts auf die Frühgeburtenrate

Die Frühgeburtenrate korrelierte hoch signifikant mit der Gemeindegröße. Während in ländlichen Regionen die Frühgeburtenrate 9,5% betrug, lag sie in Kleinstädten bei 11,7%, in mittelstädtischen Gemeinden bei 12,2% und in Großstädten bei 12,1% ( $p = 0,001$ ). Zwischen den neuen (12,1%) und alten Bundeslän-

dern (11,4%) ergab sich hinsichtlich der Frühgeburtenrate kein signifikanter Unterschied ( $p = 0,301$ ).

### Sozialer Status und Frühgeburt

Der Sozialstatus wurde anhand der Angaben der Eltern zu

1. ihrer schulischen und beruflichen Ausbildung,
2. dem Haushaltseinkommen sowie
3. der beruflichen Stellung erhoben.

Nach Winkler und Lange [35,36] wurde der Sozialstatus aus den genannten Indikatoren als Index berechnet.

Hierfür werden den 3 Indikatoren die Werte 1–7 zugewiesen und addiert, wodurch ein Spektrum von mindestens 3 bis maximal 21 Punkten abgedeckt werden kann.

Es wird somit der Sozialstatus der Familie klassifiziert. Ein niedriger liegt bei 3–8 Punkten, ein mittlerer bei 9–14 und hoher Sozialstatus bei 15–21 Punkten vor.

Für Klassifikation geht auch die derzeitige Berufsstellung bzw. die zuletzt eingenommene Stellung ein.

Die Berücksichtigung des sozialen Status lieferte signifikante Ergebnisse. Die Frühgeburtenrate betrug 13,5% bei niedrigem, 11,1% bei mittlerem und 10,5% bei hohem sozialen Status ( $p < 0,001$ ).

### Multivariable Auswertung für Risiken der Frühgeburt

Bei der Auswertung durch eine logistische Regression für Risiken der Frühgeburt wurden die verschiedenen Risikofaktoren schrittweise hinzugefügt (● Tab. 1).

Das Alter der Mutter bezieht sich auf den Zeitpunkt der Geburt des Kindes, der BMI aber auf den Zeitpunkt der Befragung, was somit einschränkend nur einen gewissen Anhaltspunkt auf den tatsächlichen Zusammenhang geben kann.

Die Mehrlingsschwangerschaft war mit Abstand der bedeutsamste Risikofaktor für eine Frühgeburt. Gegenüber Einlingen ist das Risiko um das 13-Fache erhöht (● Tab. 1).

Danach folgt die Parität, wobei die Anzahl vorangegangener Schwangerschaften oder älterer Geschwister kaum von Bedeutung war, weshalb diese alle zusammengefasst wurden: Das Risiko bei Nulliparae ist auf das 1,5-Fache erhöht (● Tab. 1).

Kinder aus den östlichen Bundesländern hatten nur ein geringfügig erhöhtes Risiko (weniger als 20%) von Frühgeburt (● Tab. 1).

Als weitere Risikofaktoren wurde die Größe der Mutter analysiert, welche zur besseren Darstellbarkeit pro 10 cm stratifiziert wurde. Mütter aus Städten, besonders aus mittelgroßen, haben ein höheres Frühgeburtenrisiko als solche aus ländlichen Gegenden. Mittlerer und hoher Sozialstatus vermindert das Risiko, während ein Migrationshintergrund ihn erhöht (● Tab. 1). Das Alter der Mutter spielt keine große Rolle. Das Risiko nimmt mit der Körpergröße der Mutter ab und ist bei niedrigem und sehr hohem BMI größer (● Tab. 1).

### Diskussion

Die Frühgeburt ist ein globales Problem. In fast allen Ländern der Welt wird ein Anstieg der Frühgeburtenrate beobachtet. Die Frühgeburt ist die Hauptursache perinataler Mortalität. Weltweit werden jedes Jahr ungefähr 15 Millionen Neugeborene zu früh geboren und über 1 Million Kinder sterben jährlich an den Folgen der Frühgeburt [2]. In industriell höher entwickelten Ländern liegt die Frühgeburtenrate bei 7,5%, in weniger entwickelten Län-

dern bei 8,8% und in am wenigsten entwickelten Ländern bei 12,5% [37].

Die Chorioamnionitis ist ein bedeutender Kofaktor für eine Frühgeburt. So ließ sich bspw. eine histologisch gesicherte Chorioamnionitis in ca. 60–80% der Plazenten von Müttern, die vor der 28. Schwangerschaftswoche, und in 40–50% der Plazenten bei einer Geburt zwischen der 29. und 34. SSW nachweisen [19].

Nach der Klassifikation der Weltgesundheitsorganisation (WHO) werden Frühgeburten in 3 Gruppen kategorisiert, „extremely preterm“ ( $< 28$  SSW); „very preterm“ (28 bis  $< 32$  SSW) und „moderate to late preterm“ (32 bis  $< 37$  SSW).

Die „Late preterm infants“ sind die am schnellsten wachsende Untergruppe der Frühgeburten und machen mehr als 80% aller Frühgeburten aus (Deutschland 2013: 83% [6]).

Neben den unmittelbaren Folgen hat die Frühgeburt auch ein erhöhtes Risiko für Spätfolgen wie chronische Krankheiten, sowie eine erhöhte Mortalität im späteren Lebenslauf. Viele der Überlebenden leiden ihr gesamtes Leben an den Behinderungen, Lernschwächen sowie Seh- und Hörstörungen. Noch bei den Kindern unter 5 Jahren gehören frühgeburtsassoziierte Komplikationen neben der Pneumonie zu den Haupttodesursachen [38].

Nach der Bundesauswertung zum Erfassungsjahr 2013 des Instituts für angewandte Qualitätsförderung und Forschung im Gesundheitswesen GmbH (AQUA) betrug die Frühgeburtenrate in Deutschland 8,7% [6].

Die aus den KiGGS-Daten ermittelte Frühgeburtenrate ist dagegen höher und beträgt bezogen auf das Gesamtkollektiv 11,6%. Bei Betrachtung der einzelnen Geburtsjahrgänge (1985–2006) liegt sie zwischen 8 und 14,9%. Für die Jahre 1994 bis 2006 konnten die Daten aus dem KiGGS-Survey mit den Frühgeburtenraten aus dem Informationssystem der Gesundheitsberichterstattung des Bundes (GBE Bund) verglichen werden (● Abb. 1). Die Daten aus dem KiGGS-Survey unterschieden sich signifikant von den Daten des GBE Bund ( $p = 0,0002$ ). Sie waren in jedem Beobachtungsjahr ca. 2–3-mal höher als in den Angaben des GBE Bund, wobei die Trendlinie beider Datengrundlagen nahezu parallel verläuft (Steigung der Trendlinie KiGGS 0,0031 vs. Steigung der Trendlinie GBE Bund 0,0026).

Dies ist besonders interessant, weil Surveys – wie KiGGS – durch ihre direkte und repräsentative Datenerhebung am Individuum als beste Methode zur Bestimmung von Prävalenzen anerkannt sind.

Eine mögliche Ursache der Diskrepanz mag sein, dass zu dieser Zeit in der Bundesrepublik Deutschland keine einheitliche und strukturierte perinatale Dokumentation durchgeführt wurde und somit die Ergebnisse der einzelnen Bundesländer nur eingeschränkt vergleichbar sind [39].

Eine weitere Erklärung kann die Qualität der Prozessdaten – also Daten aus dem Versorgungsprozess – sein, die bspw. durch uneinheitliche Dokumentationsmethoden in den Geburtsabteilungen beeinflusst werden könnten.

Ferner muss beim Vergleich von Frühgeburtenraten verschiedener Jahrzehnte auch kritisch hinterfragt werden, ob diese überhaupt miteinander verglichen werden können. Durch die besseren Überlebenschancen extrem früher Frühgeborener und sehr leicht geborener Kinder könnte sich z. B. auch die Registrierungspraxis verändert haben.

Hinsichtlich des Auftretens von Mehrlingsschwangerschaften konnten frühere Arbeiten zeigen, dass in allen Industrienationen die Mehrlingsraten ansteigen, was vor allem durch reproduktionsmedizinische Maßnahmen erklärt wird [40]. 40–60% der Mehrlinge werden als Frühgeburt geboren [24]. Die perinatale

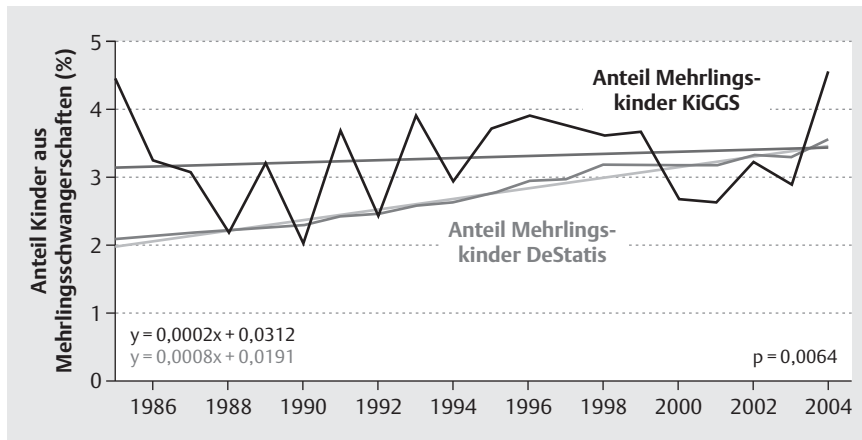

**Abb. 2** Vergleich der Anteile von Kindern aus Mehrlingsschwangerschaften aus dem KiGGS-Datensatz mit denen aus der Genesis-Datenbank des Statistischen Bundesamts (DeStatis).

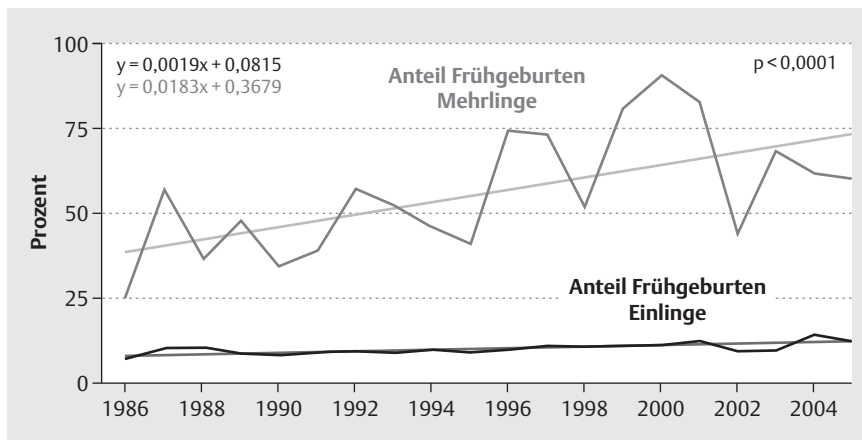

**Abb. 3** Entwicklung des Anteils von Frühgeburten bei Einlingen und Mehrlingen im Beobachtungszeitraum des KiGGS-Survey.

Mortalität ist gegenüber Einlingen bei Zwillingen 4-fach und bei Drillingsen 6-fach erhöht [41]. Die Morbidität und Mortalität von Zwillingen nach reproduktionsmedizinischen Maßnahmen unterscheidet sich jedoch nicht von spontan entstandenen Zwillingen [42].

Nach der Hellin'schen Regel lässt sich die Häufigkeit spontaner Mehrlinge nach der Formel  $1 : 85^{n-1}$  berechnen, wobei  $n$  der Zahl der Kinder entspricht. Bezogen auf Zwillinge liegt die errechnete Häufigkeit bei  $1 : 85$  (1,2%) und bei Drillingsen  $1 : 85^2$  ( $= 1 : 7225$ ; 0,014%).

Eine erhöhte Prävalenz von Mehrlingsschwangerschaften zeigte sich auch in unserer Analyse. Im Beobachtungszeitraum des KiGGS-Survey lag der Anteil der Kinder aus Mehrlingsschwangerschaften bei durchschnittlich 3,3% mit einem leicht ansteigenden Trend.

Diese Ergebnisse stehen im Einklang mit den statistischen Daten des Statistischen Bundesamts [43], die in der **Abb. 2** verglichen werden.

Eine Mehrlingsschwangerschaft ist ein bedeutender Risikofaktor für eine Frühgeburt. Unsere Daten ergaben, dass 57,4% der Mehrlinge als Frühgeburten geboren wurden (**Abb. 3**). Die Trendanalyse ergab einen nahezu 10-fachen Anstieg im Verlauf bei Mehrlingen gegenüber Einlingen (0,0019 vs. 0,0183).

Diese Ergebnisse stehen ebenfalls in Einklang mit bereits publizierten Daten.

So konnten Bergmann et al. bei der Auswertung Berliner Daten einen Anstieg des Anteils von Mehrlingsgeburten zwischen 1993 und 1999 von 1,3 auf 1,8% feststellen. In dieser Arbeit konnte bei

der Betrachtung des Mehrlingsanteils an Frühgeburten ebenso wie bei dem Anteil der Schwangerschaften nach reproduktionsmedizinischen Maßnahmen ein Anstieg beobachtet werden [44]. Hinsichtlich des BMI der Mutter ist bekannt, dass Extremgewichte – Übergewicht und Untergewicht – mit einem erhöhten Frühgeburtsrisiko assoziiert sind. Trotz der simultanen Berücksichtigung von Faktoren im logistischen Modell, die ihrerseits den BMI beeinflussen, wie niedriger sozioökonomischer Status oder Ethnizität, blieb aber der Zusammenhang bestehen [45,46]. Sowohl Frauen mit einem BMI  $< 19 \text{ kg/m}^2$  als auch über  $> 35 \text{ kg/m}^2$  hatten ein erhöhtes Risiko für eine Frühgeburt (OR 1,315 bzw. 1,109).

Bei der Untersuchung der Elternherkunft als Einflussfaktor hat sich gezeigt, dass ein Migrationshintergrund einen Risikofaktor für eine Frühgeburt darstellt. Mütter aus der Türkei, dem Nahen Osten, dem Mittleren Osten und Nordafrika sowie Asien (hier zusammengefasst wegen ähnlichen Risikomusters) waren hierbei am häufigsten betroffen. Eine mögliche Erklärung mag sein, dass Migranten aus diesen Ländern ihre Heimat wegen extrem belastender Bedingungen, z.B. politischer Spannungen und Krieg, verlassen mussten. In einer schwedischen Studie von Liu et al. wurde das Risiko für eine Frühgeburt bei Migrantinnen aus Bürgerkriegsgebieten in Abhängigkeit von ihrer Aufenthaltsdauer in Schweden ausgewertet. Hierbei zeigte sich, dass sie im 1. Jahr in Schweden am höchsten war (1,39) und nach 2 bzw. 3–5 Jahren abfiel [47].

Eine Korrelation mit der Aufenthaltsdauer von Migrantinnen in Deutschland und der Frühgeburtenrate zeigte sich auch in unse-

rer Auswertung (Jahr 1: 12,4%; in den Jahren 2–10 nach Ankunft: 14,3%; und ab 11 Jahren: 11,3%).

In diesem Kontext sollte aber auch das sogenannte „Latina epidemiologic paradox“ oder der „Healthy-migrant-Effect“ Erwähnung finden, die in fast allen Einwanderergesellschaften vorzufinden sind. Ursprünglich wurde mit diesem Paradox beschrieben, dass US-Amerikaner mit hispanischem oder lateinamerikanischem Ursprung vergleichbare oder gar bessere Gesundheitsbefunde hatten als kaukasische US-Amerikaner, und das obwohl lateinamerikanische Amerikaner häufiger einen geringeren sozioökonomischen Status haben [48]. Hinsichtlich Schwangerschaften mexikanischer Frauen zeigte sich, dass sie sowohl ein geringeres Risiko für niedrige kindliche Geburtsgewichte als auch für eine Frühgeburt hatten, welches ca. 30% unter dem Risiko vergleichbarer nicht mexikanischer US-Amerikanerinnen lag [49]. Dieses Paradox war jedoch nur in der 1. Einwanderergeneration nachweisbar. Einwanderer sollen zunächst Traditionen und Verhaltensweisen mitbringen, die gesundheitliche Vorteile bieten können, z.B. stützende Familienstrukturen, die sie aus ihrem Ursprungsland mitbringen, und die sich günstig auf die reproduktive Gesundheit auswirken können [50,51].

Im Rahmen von Anpassungsvorgängen an die neue Umgebung und sogenannten Akkulturationsprozessen sind diese gesundheitsunterstützenden Verhaltensweisen in der 2. und 3. Generation nicht mehr nachweisbar [52].

Die Zahlen unserer Studie zeigen, dass nach 10 Jahren Aufenthaltsdauer die Frühgeburtenrate von Migrantinnen sich der von Nichtmigrantinnen angleicht (11,3 vs. 11,6%). Es handelt sich offensichtlich um einen hochkomplexen Sachverhalt, der durch diverse Faktoren wie z.B. Herkunftsland, Art der Migration (bspw. Zuwanderung vs. Flucht vor Krieg), sozialem Status und Zugang zu medizinischer Versorgung beeinflusst werden kann.

Bewohnerinnen städtischer Regionen hatten häufiger eine Frühgeburt als Bewohnerinnen ländlicher Regionen. Unsere Daten zeigten außerdem, dass Frauen mit Migrationshintergrund in größeren Gemeinden häufiger eine Frühgeburt haben, die Frühgeburtenrate jedoch rückläufig ist, je länger sie in Deutschland leben.

Diese Erkenntnisse passen zu bereits publizierten Studien. Beispielsweise konnten Kent et al. zeigen, dass Einwohner dicht besiedelter urbaner Regionen häufiger Früh- und Fehlgeburten erleben. Am Beispiel von Amerikanern afrikanischer Herkunft unterhalb der Armutsgrenze konnte zudem gezeigt werden, dass das Wohnen städtischer Regionen häufiger mit Früh- und Fehlgeburten assoziiert ist als das von ländlichen Gebieten [53].

Der soziale Status ist ein wichtiger Kofaktor für die Entstehung der Frühgeburt. Mehrere Autoren berichteten, dass Frauen mit niedrigem sozialen Status häufiger eine Frühgeburt erlitten [53, 54]. In der Arbeit von Straube et al. lag die Frühgeburtenrate bei un- bzw. angelernten Arbeiterinnen bei 7,8% und bei höheren oder leitenden Beamtinnen 6,3%. In Kombination mit weiteren Risikofaktoren potenzierten sie sich sogar. So stieg die Frühgeburtenrate bei Frauen  $\geq 40$  Jahre mit mehr als 4 Lebendgeburten bei Arbeiterinnen von 8,2 auf 13,8% gegenüber höheren oder leitenden Beamtinnen (5,6%) [55].

Die Bedeutung des Sozialstatus wird dadurch noch verstärkt, dass ein höherer sozialer Status nicht nur das Frühgeburtsrisiko senkt, sondern bei ehemaligen Frühgeborenen die Entwicklung von kognitiven und sozialen Defiziten reduziert.

Treyvaud et al. zeigten z.B., dass eine optimale häusliche Umgebung mit besserer kognitiver und sozioemotionaler Entwicklung für Frühgeborene einhergeht [56]. Unsere Ergebnisse konnten

den Einfluss des Sozialstatus ebenfalls bestätigen. Die OR für eine Frühgeburt betrug bei mittlerem und hohem sozialen Status 0,805 bzw. 0,701.

## Zusammenfassung

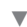

Zusammenfassend handelt es sich bei der vorliegenden Arbeit um die erste systematische und verallgemeinerungsfähige Analyse der Einflussfaktoren auf die Frühgeburt in Deutschland.

Die Frühgeburtenrate im KiGGS-Survey betrug 11,6%, wobei sie stratifiziert nach Geburtsjahrgängen (1985–2006) bei bis zu 14,9% lag.

Bemerkenswerterweise lag die Frühgeburtenrate in diesem Survey deutlich höher als die Statistiken des GBE Bund bzw. Statistischen Bundesamts, die auf Prozessdaten basieren.

Trotz intensiver Bemühungen ist es bislang nicht gelungen, die Frühgeburt zu verhindern bzw. die Frühgeburtenrate zu reduzieren. Weder umfangreiche Informationen zu bekannten Risikofaktoren, der Ausbau der ärztlichen Schwangerschaftsvorsorge, gut ausgestattete Perinatalzentren noch diverse Therapieansätze (Wehenhemmung, Progesteron-Gabe, Cerclage) konnten die Frühgeburtenrate senken.

Neben untergewichtigen Schwangeren und Schwangeren mit niedrigem sozialen Status sollte Schwangeren mit Migrationshintergrund besondere Aufmerksamkeit bei der Vorsorge zukommen. Die Auswertung der KiGGS-Daten hat gezeigt, dass besonders Schwangere aus sogenannten Krisenländern von einem erhöhten Frühgeburtsrisiko betroffen sind und dieses auch nach Jahren in Deutschland weiterbesteht.

Unsere Untersuchung ergab ferner, dass mehr als die Hälfte aller Mehrlingsschwangerschaften als Frühgeburt enden.

Mit zunehmender Inanspruchnahme reproduktionsmedizinischer Maßnahmen sollten diese Zahlen zum Anlass genommen werden, auch beim Transfer von nur 2 Embryonen über das erhöhte Frühgeburtsrisiko aufzuklären bzw. den Versuch, die reproduktionsmedizinische Erfolgsrate zu steigern, mit dem erhöhten Risiko für eine Frühgeburt abzuwägen.

Ganz offensichtlich besteht weiterhin Handlungsbedarf, gefährdete Schwangere zu erkennen und so ggf. eine Frühgeburt zu vermeiden. Sollten sich Hinweise auf eine drohende Frühgeburt ergeben, könnte eine Behandlung in einem Perinatalzentrum initiiert werden.

Dies gelingt jedoch am besten, wenn die Einflussfaktoren bekannt sind. Unsere Arbeit hat systematisch relevante Faktoren analysiert und zusammengefasst, die in der täglichen Praxis helfen sollen, Risikoschwangere rechtzeitig zu identifizieren.

## Danksagung

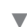

Wir danken Herrn Privatdozent Dr. Martin Schlaud vom Robert Koch-Institut für die Hilfen bei der Datenbeschaffung. Diese Studie wurde ermöglicht durch eine nicht zweckgebundene Spende der Conrad Naber Stiftung (Bremen).

## Interessenkonflikt



Nein.

## Literatur

- 1 Bergmann RL, Dudenhausen JW. Prädiktion und Prävention der Frühgeburt. *Gynäkologe* 2003; 36: 391–402
- 2 Blencowe H, Cousens S, Oestergaard MZ et al. National, regional, and worldwide estimates of preterm birth rates in the year 2010 with time trends since 1990 for selected countries: a systematic analysis and implications. *Lancet* 2012; 379: 2162–2172
- 3 Langhoff-Roos J, Kesmodel U, Jacobsson B et al. Spontaneous preterm delivery in primiparous women at low risk in Denmark: population based study. *BMJ* 2006; 332: 937–939
- 4 Martin JA, Hamilton BE, Sutton PD et al. Births: final data for 2005. *Natl Vital Stat Rep* 2007; 56: 1–103
- 5 Norman JE, Morris C, Chalmers J. The effect of changing patterns of obstetric care in Scotland (1980–2004) on rates of preterm birth and its neonatal consequences: perinatal database study. *PLoS Med* 2009; 6: e1000153
- 6 Online: <https://www.sgg.de/sqg/upload/CONTENT/Qualitaetsberichte/2013/AQUA-Qualitaetsreport-2013.pdf>
- 7 Zeitlin J, Szamotulska K, Drewniak N et al. Preterm birth time trends in Europe: a study of 19 countries. *BJOG* 2013; 120: 1356–1365
- 8 McCormick MC. The contribution of low birth weight to infant mortality and childhood morbidity. *N Engl J Med* 1985; 312: 82–90
- 9 Lawn JE, Gravett MG, Nunes TM et al. Global report on preterm birth and stillbirth (1 of 7): definitions, description of the burden and opportunities to improve data. *BMC Pregnancy Childbirth* 2010; 10 (Suppl. 1): S1
- 10 Escobar GJ, Littenberg B, Petitti DB. Outcome among surviving very low birthweight infants: a meta-analysis. *Arch Dis Child* 1991; 66: 204–211
- 11 Kerr-Wilson CO, Mackay DF, Smith GC et al. Meta-analysis of the association between preterm delivery and intelligence. *J Public Health (Bangkok)* 2012; 34: 209–216
- 12 Karlberg J, Albertsson-Wikland K, Baber FM et al. Born small for gestational age: consequences for growth. *Acta Paediatr* 1996; 417: 8–13; discussion 14
- 13 Boivin A, Luo ZC, Audibert F et al. Pregnancy complications among women born preterm. *CMAJ* 2012; 184: 1777–1784
- 14 Zetterstrom K, Lindeberg S, Haglund B et al. Being born small for gestational age increases the risk of severe pre-eclampsia. *BJOG* 2007; 114: 319–324
- 15 Boivin A, Luo ZC, Audibert F et al. Risk for preterm and very preterm delivery in women who were born preterm. *Obstet Gynecol* 2015; 125: 1177–1184
- 16 Saigal S, Doyle LW. An overview of mortality and sequelae of preterm birth from infancy to adulthood. *Lancet* 2008; 371: 261–269
- 17 Slattery MM, Morrison JJ. Preterm delivery. *Lancet* 2002; 360: 1489–1497
- 18 Tucker JM, Goldenberg RL, Davis RO et al. Etiologies of preterm birth in an indigent population: is prevention a logical expectation? *Obstet Gynecol* 1991; 77: 343–347
- 19 Lahra MM, Jeffery HE. A fetal response to chorioamnionitis is associated with early survival after preterm birth. *Am J Obstet Gynecol* 2004; 190: 147–151
- 20 Schure V, Voigt M, Schild RL et al. Perinatal risks in “late motherhood” defined based on parity and preterm birth rate – an analysis of the German perinatal survey (20th communication). *Geburtsh Frauenheilk* 2012; 72: 49–55
- 21 McClamrock HD, Jones HW Jr., Adashi EY. Ovarian stimulation and intra-uterine insemination at the quarter centennial: implications for the multiple births epidemic. *Fertil Steril* 2012; 97: 802–809
- 22 Ferraretti AP, Goossens V, de Mouzon J et al. Assisted reproductive technology in Europe, 2008: results generated from European registers by ESHRE. *Hum Reprod* 2012; 27: 2571–2584
- 23 VanderWeele TJ, Lantos JD, Lauderdale DS. Rising preterm birth rates, 1989–2004: changing demographics or changing obstetric practice? *Soc Sci Med* 2012; 74: 196–201
- 24 Blondel B, Macfarlane A, Gissler M et al. General obstetrics: preterm birth and multiple pregnancy in European countries participating in the PERISTAT project. *BJOG* 2006; 113: 528–535
- 25 Lipkind HS, Curry AE, Huynh M et al. Birth outcomes among offspring of women exposed to the September 11, 2001, terrorist attacks. *Obstet Gynecol* 2010; 116: 917–925
- 26 Merrill RM. Introduction to Epidemiology. 6th ed. Burlington, Mass.: Jones & Bartlett Learning; 2013
- 27 Mann CJ. Observational research methods. Research design II: cohort, cross sectional, and case-control studies. *Emerg Med J* 2003; 20: 54–60
- 28 Bergmann KE, Thefeld W, Kurth BM. [The Child and Adolescent Health Survey – a foundation for prevention, health promotion and health goals]. *Gesundheitswesen* 2002; 64 (Suppl. 1): S53–S58
- 29 Bergmann KE, Bergmann RL, Ellert U et al. [Perinatal risk factors for long-term health. Results of the German Health Interview and Examination Survey for Children and Adolescents (KiGGS)]. *Bundesgesundheitsblatt Gesundheitsforschung Gesundheitsschutz* 2007; 50: 670–676
- 30 Bergmann KE, Thefeld W, Kurth B-M. Der Kinder- und Jugendgesundheitsurvey soll die gesundheitliche Situation der Kinder und Jugendlichen in Deutschland beschreiben. *Monatsschr Kinderheilkd* 2002; 150: 1543–1545
- 31 Kurth BM, Kamtsiuris P, Hölling H et al. The challenge of comprehensively mapping children's health in a nation-wide health survey: design of the German KiGGS-Study. *BMC Public Health* 2008; 8: 196
- 32 Hölling H, Kamtsiuris P, Lange M et al. [The German Health Interview and Examination Survey for Children and Adolescents (KiGGS): study management and conduct of fieldwork]. *Bundesgesundheitsblatt Gesundheitsforschung Gesundheitsschutz* 2007; 50: 557–566
- 33 Kamtsiuris P, Bergmann KE, Dippelhofer A et al. [Pilot study of The Child and Adolescent Health Survey: methodological aspects and procedure]. *Gesundheitswesen* 2002; 64 (Suppl. 1): S99–S106
- 34 Bergmann KE, Schlack R, Dewitz C et al. Ethische und rechtliche Aspekte der epidemiologischen Forschung mit Kindern und Jugendlichen in Deutschland am Beispiel des Kinder- und Jugendgesundheitsurveys. *Ethik Med* 2004; 16: 22–36
- 35 Winkler J, Stolzenberg H. Adjustierung des Sozialen-Schicht-Index für die Anwendung im Kinder- und Jugendgesundheitsurvey (KiGGS) 2003/2006. Wismar: Hochschule; 2009
- 36 Lange M, Kamtsiuris P, Lange C et al. [Sociodemographic characteristics in the German Health Interview and Examination Survey for Children and Adolescents (KiGGS) – operationalisation and public health significance, taking as an example the assessment of general state of health]. *Bundesgesundheitsblatt Gesundheitsforschung Gesundheitsschutz* 2007; 50: 578–589
- 37 Beck S, Wojdyla D, Say L et al. The worldwide incidence of preterm birth: a systematic review of maternal mortality and morbidity. *Bull World Health Organ* 2010; 88: 31–38
- 38 Liu L, Oza S, Hogan D et al. Global, regional, and national causes of child mortality in 2000–13, with projections to inform post-2015 priorities: an updated systematic analysis. *Lancet* 2015; 385: 430–440
- 39 Goerke K, Lack N. Qualitätssicherung in der Geburtshilfe – Perinatalerhebung. *Gynäkologe* 2000; 33: 220–224
- 40 Ballabh P, Kumari J, Alkoutly HB et al. Neonatal outcome of triplet versus twin and singleton pregnancies: a matched case control study. *Eur J Obstet Gynecol Reprod Biol* 2003; 107: 28–36
- 41 [Anonym]. Multiple gestation pregnancy. The ESHRE Capri Workshop Group. *Hum Reprod* 2000; 15: 1856–1864
- 42 Andrijasevic S, Dotlic J, Aksam S et al. Impact of conception method on twin pregnancy course and outcome. *Geburtsh Frauenheilk* 2014; 74: 933–939
- 43 Statistisches Bundesamt. Statistik der Geburten, Statistik 12612. Online: <https://www-genesis.destatis.de/>; Stand: 25.11.2014
- 44 Bergmann RL, Richter R, Bergmann KE et al. The prevalence of preterm deliveries in Berlin has not changed over 7 years: the impact of multiple births. *J Perinat Med* 2004; 32: 234–239
- 45 Han Z, Mulla S, Beyene J et al. Maternal underweight and the risk of preterm birth and low birth weight: a systematic review and meta-analysis. *Int J Epidemiol* 2011; 40: 65–101
- 46 McDonald SD, Han Z, Mulla S et al. Overweight and obesity in mothers and risk of preterm birth and low birth weight infants: systematic review and meta-analyses. *BMJ* 2010; 341: c3428
- 47 Liu C, Urquia M, Cnattingius S et al. Migration and preterm birth in war refugees: a Swedish cohort study. *Eur J Epidemiol* 2014; 29: 141–143
- 48 Markides KS, Coreil J. The health of Hispanics in the southwestern United States: an epidemiologic paradox. *Public Health Rep* 1986; 101: 253–265
- 49 Cervantes A, Keith L, Wyshak G. Adverse birth outcomes among native-born and immigrant women: replicating national evidence regarding Mexicans at the local level. *Matern Child Health J* 1999; 3: 99–109
- 50 Dyer JM, Hunter R, Murphy PA. Relationship of social network size to infant birth weight in Hispanic and non-Hispanic women. *J Immigr Minor Health* 2011; 13: 487–493

- 51 Flores ME, Simonsen SE, Manuck TA et al. The "Latina epidemiologic paradox": contrasting patterns of adverse birth outcomes in U.S.-born and foreign-born Latinas. *Womens Health Issues* 2012; 22: e501–e507
- 52 Razum O. Migration, Mortalität und der Healthy-migrant-Effekt. In: Richter M, Hurrelmann K, Hrsg. *Gesundheitliche Ungleichheit*: VS Verlag für Sozialwissenschaften; 2006: 255–270
- 53 Kent ST, McClure LA, Zaitchik BF et al. Area-level risk factors for adverse birth outcomes: trends in urban and rural settings. *BMC Pregnancy Childbirth* 2013; 13: 129
- 54 Morgen CS, Bjork C, Andersen PK et al. Socioeconomic position and the risk of preterm birth—a study within the Danish National Birth Cohort. *Int J Epidemiol* 2008; 37: 1109–1120
- 55 Straube S, Voigt M, Scholz R et al. 18th communication: preterm birth rates and maternal occupation – the importance of age and number of live births as confounding factors. *Geburtsh Frauenheilk* 2009; 69: 698–702
- 56 Treyvaud K, Inder TE, Lee KJ et al. Can the home environment promote resilience for children born very preterm in the context of social and medical risk? *J Exp Child Psychol* 2012; 112: 326–337
